# Supplementary material
Source: Research Square preprint supplement (doi:10.21203/rs.3.rs-10048801/v1)
Supplement: Supplementary file 1 [file bb4597acd6f1cc1e80de9b93.docx]

**Development and Validation of a Sensitive LC-MS/MS Method for Quantifying N‑Nitroso‑Ketamine in Ketamine Hydrochloride Injections**

Ramamohana Reddy Maddike1*, K. Suresh Babu2

*1Faculty of Sciences, Lincoln University College, Petaling Jaya 47301, Selangor Darul Ehsan, Malaysia, -
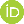
 0009-0001-4009-3008

2Faculty of Sciences, Lincoln University College, Petaling Jaya 47301, Selangor Darul Ehsan, Malaysia

* Corresponding Author: phd.ramamohana@lincoln.edu.my

**Index of Figures**

**Figure S1** Molecular structure of Ketamine Hydrochlorideand N-Nitroso- Ketamine impurity in the study

**Figure S2** Potential Reaction Mechanism for the formation of NDSRI of Ketamine

**Figure S3** DNA Alkylation Mechanistic Pathway of Nitrosamine-Induced and Damage

**Figure S4** Comparative chromatographic profiles of standard solution across different columns

**Figure S5** Certificate of N-Nitroso- Ketamine

**Figure S6** Certificate of Ketamine Hydrochloride

|  |  |
| --- | --- |
| **Ketamine Hydrochloride**  IUPAC name: 2-(2-chlorophenyl)-2-(methylamino)cyclohexan-1-one;hydrochloride  Molecular Mass: 274.18 g/mol  Molecular formula: [C13H17Cl2NO](https://pubchem.ncbi.nlm.nih.gov/#query=C13H17Cl2NO) | **N-Nitroso- Ketamine (NNK)**  IUPAC name: *N*-[1-(2-chlorophenyl)-2-oxocyclohexyl]-*N*-methylnitrous amide  Molecular Mass: 266.72 g/mol  Molecular formula: [C13H15ClN2O2](https://pubchem.ncbi.nlm.nih.gov/#query=C13H15ClN2O2) |

**Figure S1** Molecular structure of Ketamine Hydrochlorideand N-Nitroso- Ketamine impurity in the study

**Figure S2** **|** Potential Reaction Mechanism for the formation of NDSRI of Ketamine

**Figure S3 |** DNA Alkylation Mechanistic Pathway of Nitrosamine-Induced Damage


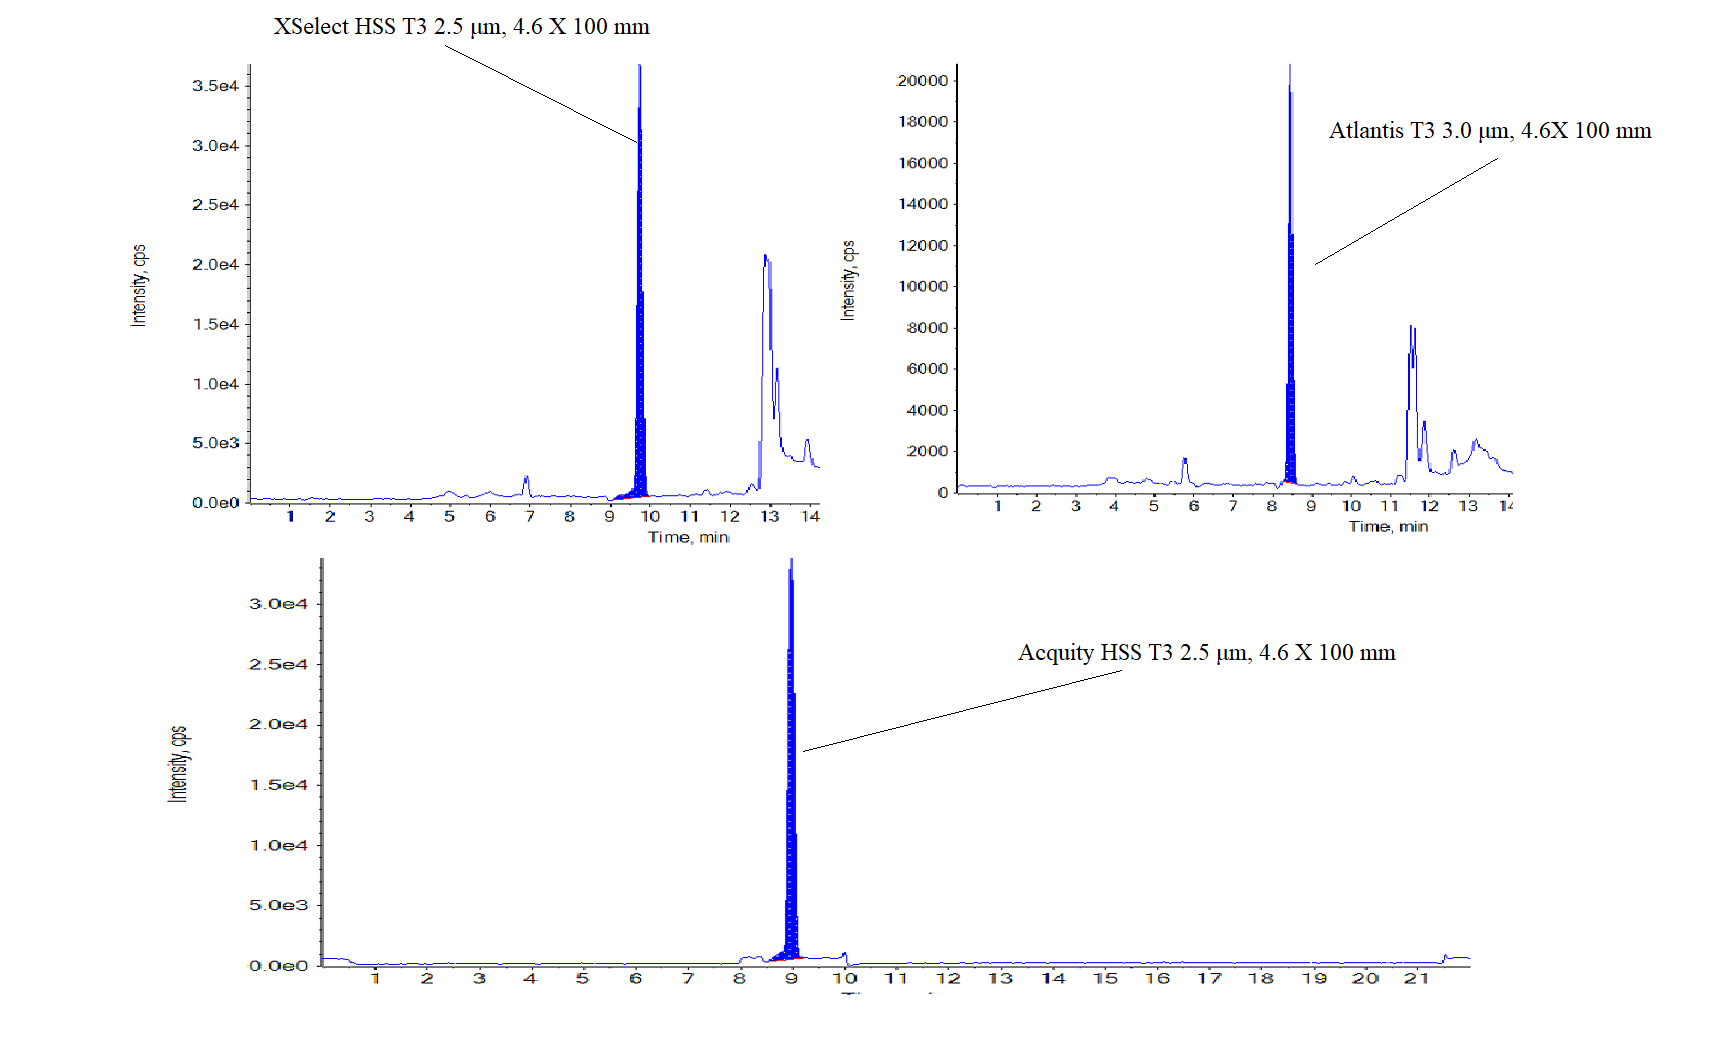
**Figure S4 |** Comparative chromatographic profiles of standard solution across different columns


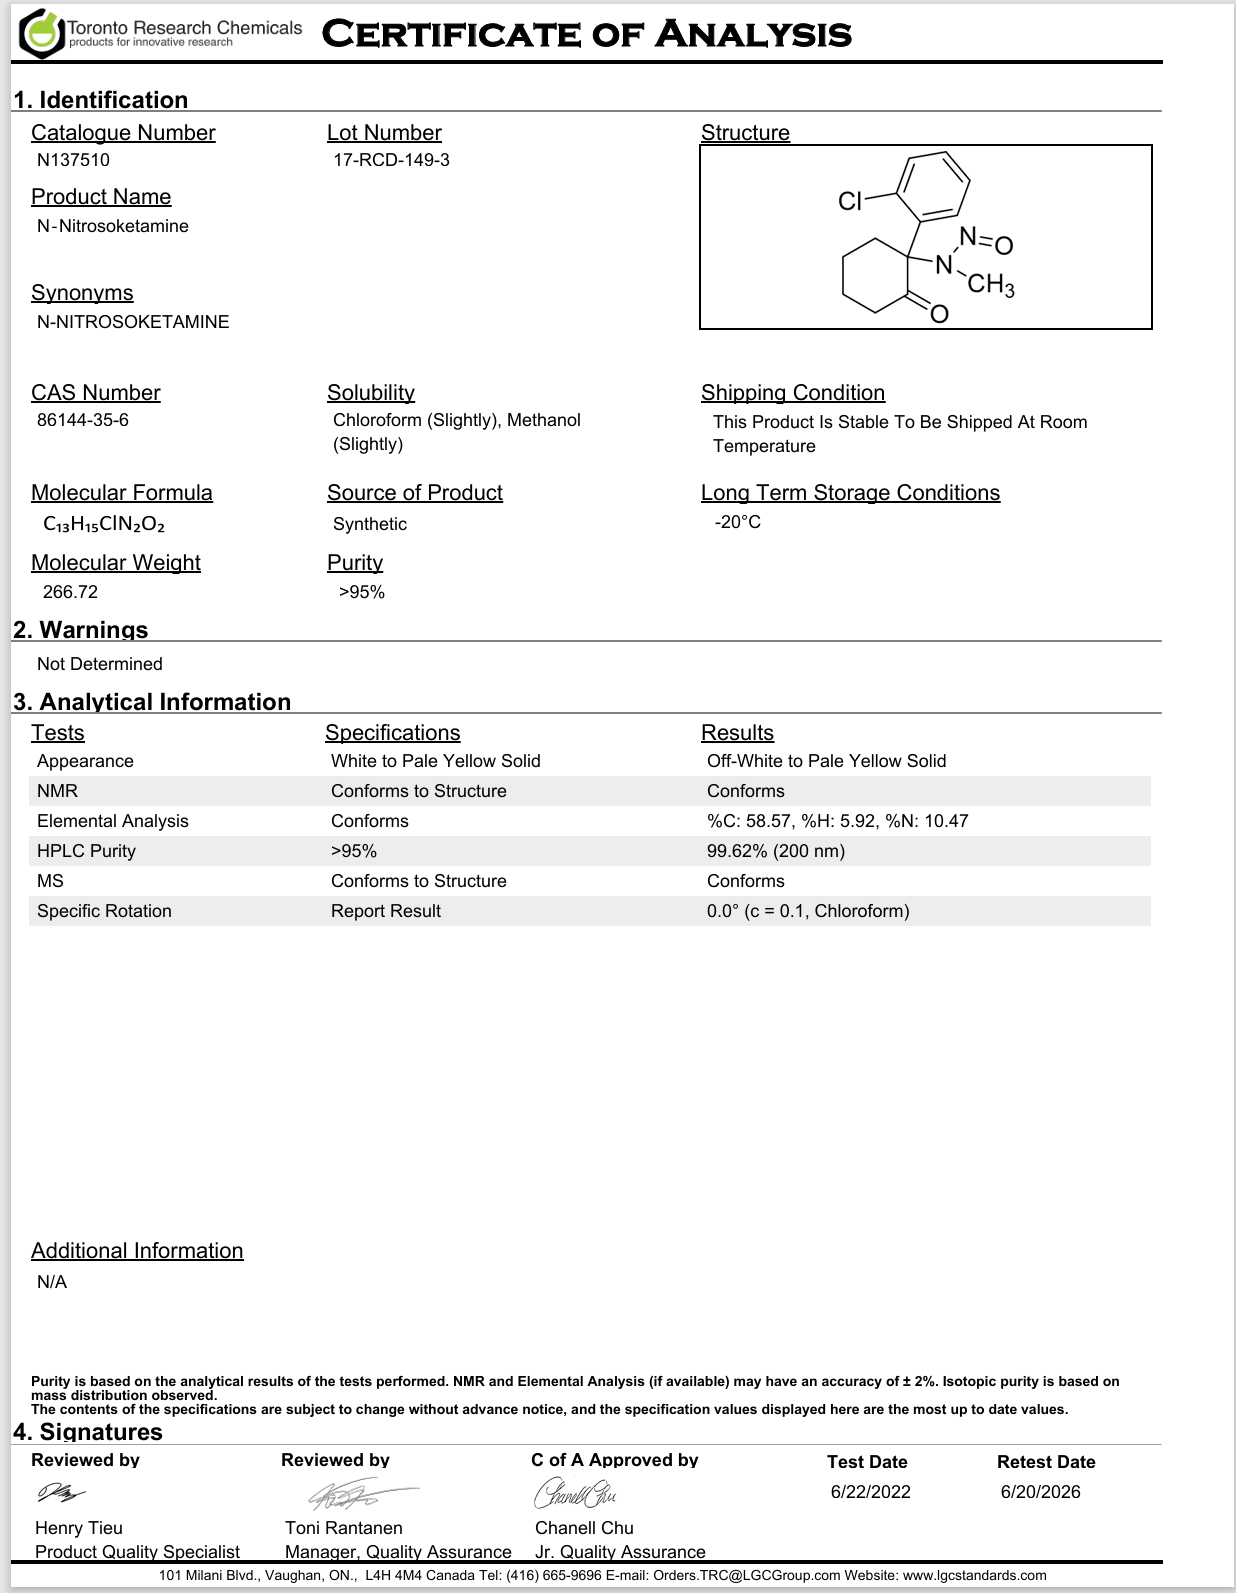


**Figure S5 |** Certificate of N-Nitroso- Ketamine


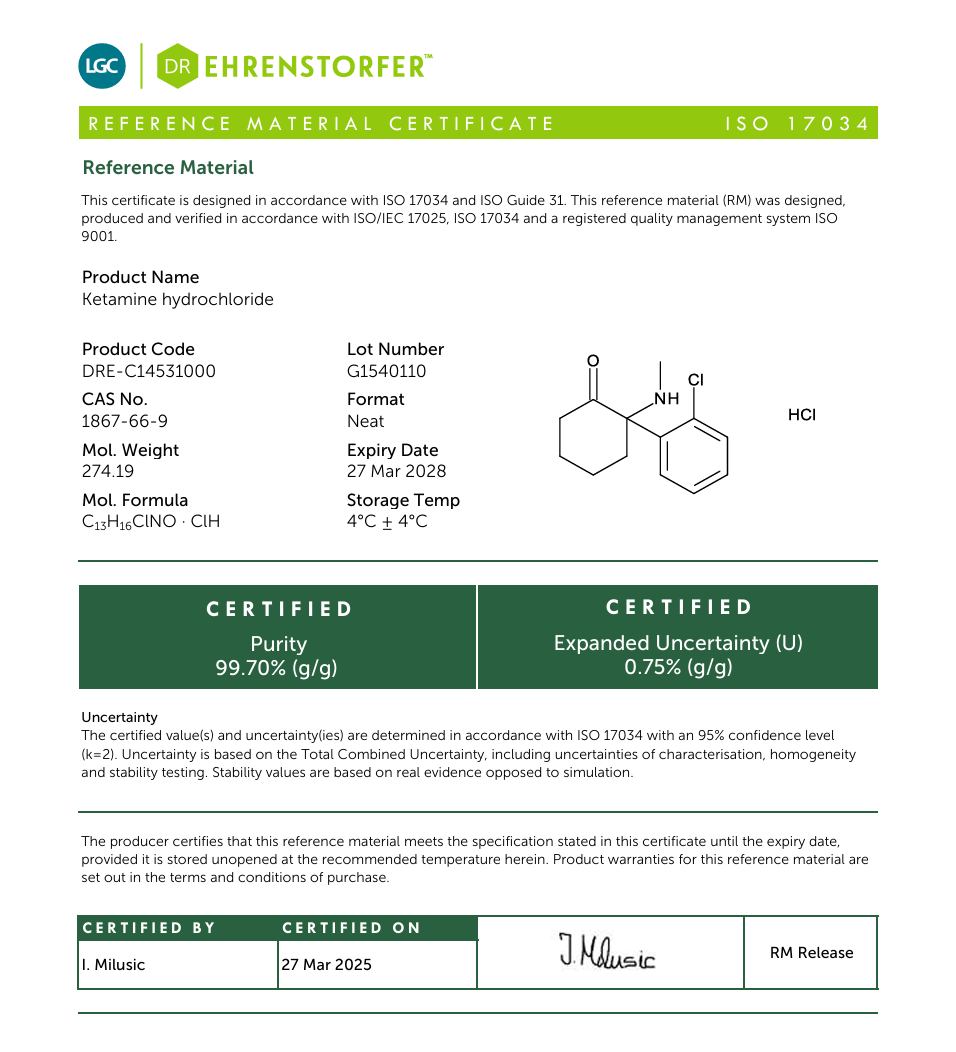


**Figure S6 |** Certificate of Ketamine Hydrochloride
