# Supplementary material
Source: Research Square preprint supplement (doi:10.21203/rs.3.rs-10048801/v1)
Supplement: Supplementary file 2 [file ffac373b579ec64886108061.docx]

Graphical abstract: Formation and Analytical Detection of N‑Nitroso‑Ketamine (NNK) in Ketamine Injection.
